# Supplementary material for: Local membrane charge regulates β2 adrenergic receptor coupling to Gi3
Source: PubMed Central journal article supplement (PMC6527575; doi:10.1038/s41467-019-10108-0), 2019-05-20
Supplement: 41467_2019_10108_MOESM1_ESM.pdf [file 41467_2019_10108_MOESM1_ESM.pdf]

## Supplementary Figures

Local membrane charge regulates  $\beta_2$  adrenergic receptor coupling to  $G_{i3}$   
Strohman et al.





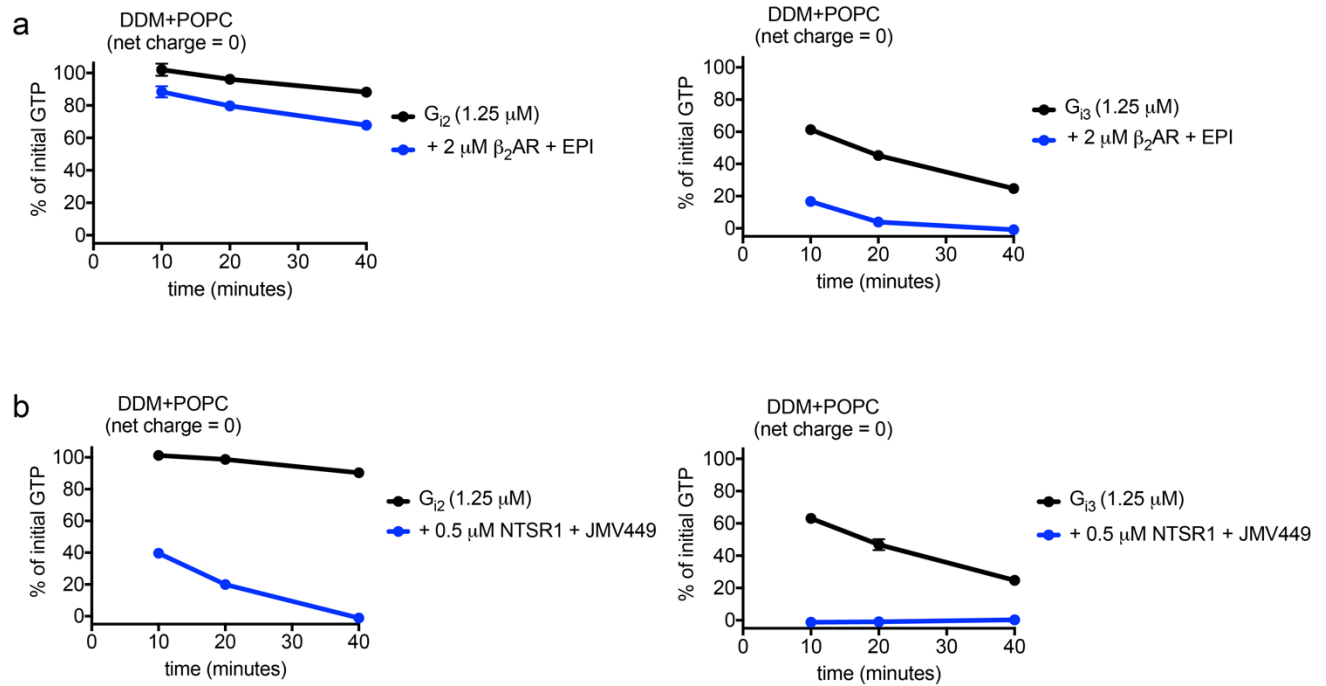

**Supplementary figure 3.** GTP turnover activity of Gi<sub>2</sub> (left) and Gi<sub>3</sub> (right) in DDM+POPC (5:1 DDM:POPC mole ratio) mixed micelles, in the absence or presence of ligand-stimulated β<sub>2</sub>AR (panel A) and NTSR1 (panel B), using the ligand epinephrine (EPI) and JMV 449, respectively. Data are mean +/- s.e.m of three independent experiments. Source data are provided in the Source Data File.

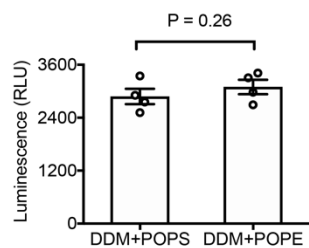

**Supplementary figure 4.** Luminescence signals from the Fig. 1f condition with  $G_{13}$  alone ( $0.25 \mu\text{M}$ ). Data are mean  $\pm$  s.e.m of four independent experiments. Statistical significance was determined using a two-sided Student's *t*-test. Source data are provided in the Source Data File.

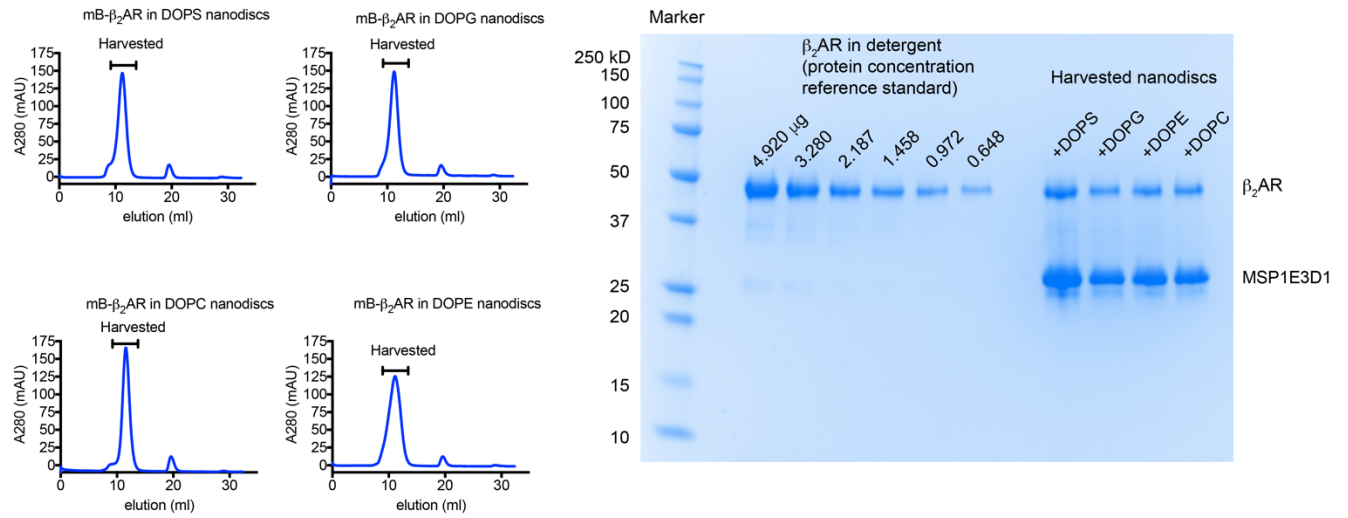

**Supplementary figure 5.** Left: Size exclusion profiles of nanodisc mB-β<sub>2</sub>AR; Right: SDS-PAGE of harvested nanodisc mB-β<sub>2</sub>AR after concentration

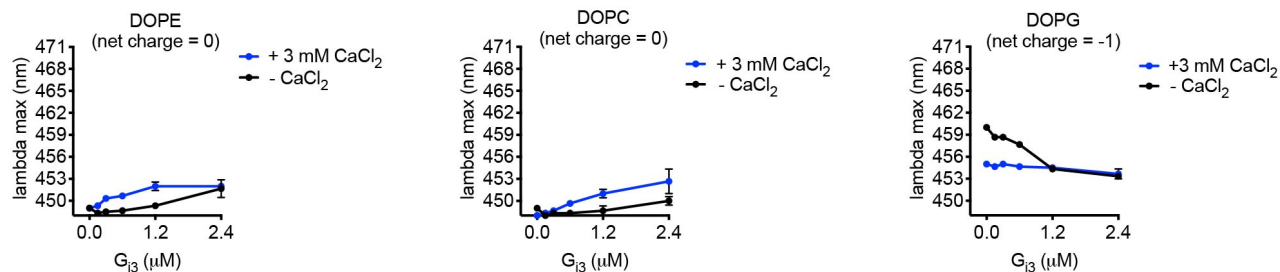

**Supplementary figure 6. Effect of Ca<sup>2+</sup> on basal mB-β<sub>2</sub>AR-G<sub>13</sub> interaction in bilayers of varying phospholipid composition** The effect of G<sub>13</sub> concentration on mB-β<sub>2</sub>AR fluorescence (+/- 3 mM CaCl<sub>2</sub>) was examined in DOPE, DOPC, and DOPG nanodisc bilayers in the absence of epinephrine. mB-β<sub>2</sub>AR concentration is 100 nM. Data are mean +/- s.e.m of three independent experiments. The net charge of the phospholipid is indicated in parentheses. Source data are provided in the Source Data File.

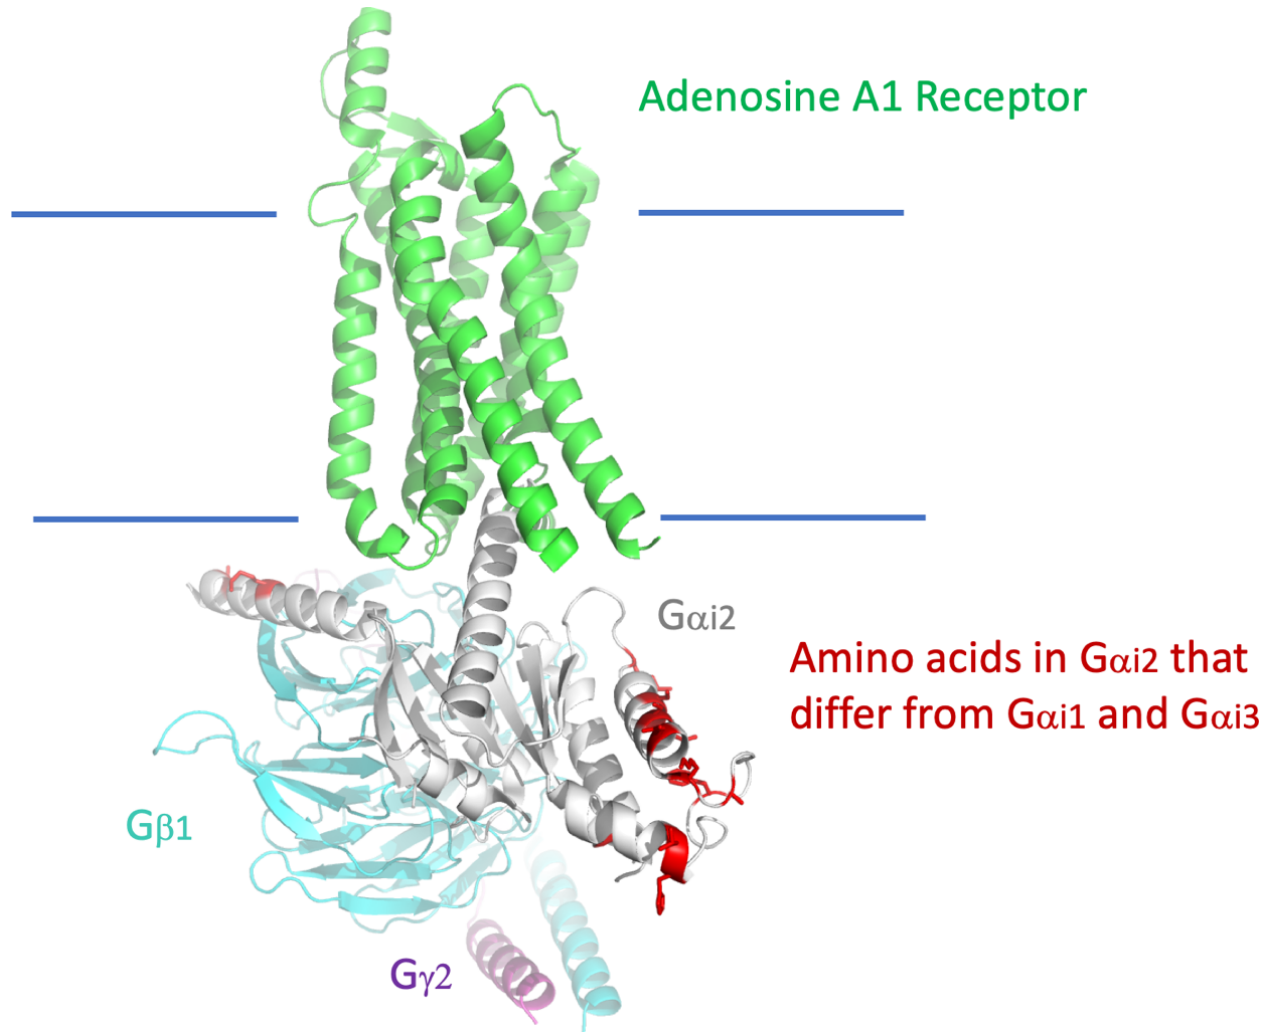

**Supplementary figure 7.** Cryo-electron microscopy structure of the adenosine A1- $G_{i2}$  complex (PDB: 6D9H). Highlighted in red are amino acids in the Ras domain of  $G\alpha_{i2}$  that differ from  $G\alpha_{i1}$  and  $G\alpha_{i3}$ .
